# Supplementary material
Source: PubMed Central journal article supplement (PMC8247409)
Supplement: JGS-69-1027-s001.pdf [file JGS-69-1027-s001.pdf]

**Supplementary Table S1.** Comparison between the Chart-based Delirium Detection Instrument (CHART-DEL) and Intensive Care Unit CHART-DEL (CHART-DEL-ICU) scoring

| Level of confidence (probability) | Description (CHART-DEL)                                                                                                                                                                                                                                                                                                                                                                                                                                                          | Description (CHART-DEL-ICU)                                                                                                                                                                                                                                                                                                                                                                                                                                                                                                                                                                                                                                                                                                                                                                                                                         | Example (CHART-DEL-ICU)                                                                |
|-----------------------------------|----------------------------------------------------------------------------------------------------------------------------------------------------------------------------------------------------------------------------------------------------------------------------------------------------------------------------------------------------------------------------------------------------------------------------------------------------------------------------------|-----------------------------------------------------------------------------------------------------------------------------------------------------------------------------------------------------------------------------------------------------------------------------------------------------------------------------------------------------------------------------------------------------------------------------------------------------------------------------------------------------------------------------------------------------------------------------------------------------------------------------------------------------------------------------------------------------------------------------------------------------------------------------------------------------------------------------------------------------|----------------------------------------------------------------------------------------|
| Definite (85%+)                   | Diagnosis is unequivocal; confirmed diagnosis made by an experienced reference standard rater (i.e., attending neurologist, geriatrician, psychiatrist).                                                                                                                                                                                                                                                                                                                         | Diagnosis is unequivocal; confirmed diagnosis made by an experienced reference standard rater (i.e., attending neurologist, ICU physician, geriatrician, psychiatrist).                                                                                                                                                                                                                                                                                                                                                                                                                                                                                                                                                                                                                                                                             | “Issues for today: Delirium ?hypoactive – try trazadone”<br>[Physician Progress Notes] |
| Probable (60-85%)                 | <p>a. All four Confusion Assessment Method (CAM) features are present in the notes:<br/>           (1) acute onset/fluctuation<br/>           (2) inattention<br/>           (3) disorganized thinking or<br/>           (4) altered level of consciousness.</p> <p>b. Acute onset of disorientation or hallucinations, especially with evidence of reversibility or evidence of attribution to medications (in someone with no history of preexisting cognitive impairment)</p> | <p>a. All four Confusion Assessment Method (CAM) features are present in the notes:<br/>           (1) acute onset/fluctuation<br/>           (2) inattention<br/>           (3) disorganized thinking or<br/>           (4) altered level of consciousness (from CAM-ICU): Patient’s level of consciousness is anything other than alert, such as being vigilant (hyperalert), lethargic (drowsy but easily aroused), in a stupor (difficult to arouse) OR a score in the 10-point Richmond Agitation-Sedation Scale (RASS) of -3, -2, +1, +2, +3 or +4</p> <p>b. An ICDSC score <math>\geq 4</math> is reported in the notes.</p> <p>c. Acute onset of disorientation or hallucinations, especially with evidence of reversibility or evidence of attribution to medications (in someone with no history of preexisting cognitive impairment)</p> | “ICDSC 5, confused, does not communicate”<br>[Physician Progress Notes]                |
| Possible (40-60%)                 | Not all CAM features are present, but at least 2 or more, plus other                                                                                                                                                                                                                                                                                                                                                                                                             | Not all CAM features are present, but at least 2 or more, plus other                                                                                                                                                                                                                                                                                                                                                                                                                                                                                                                                                                                                                                                                                                                                                                                | “Awake all night, restless pulling lines”                                              |

|                    |                                                                                                                                                                                                                                                                                                                            |                                                                                                                                                                                                                                                                                                                            |                                                                |
|--------------------|----------------------------------------------------------------------------------------------------------------------------------------------------------------------------------------------------------------------------------------------------------------------------------------------------------------------------|----------------------------------------------------------------------------------------------------------------------------------------------------------------------------------------------------------------------------------------------------------------------------------------------------------------------------|----------------------------------------------------------------|
|                    | supporting features (such as presence of agitation or inappropriate behavior).                                                                                                                                                                                                                                             | supporting features (such as presence of agitation* or inappropriate behavior).<br><br>*RASS score of +2 to +4                                                                                                                                                                                                             | [EMR]<br>"O/E: RASS: -1 to +1"<br>[Physician Progress Notes]   |
| Uncertain (10-40%) | Cases where nurses wrote ambiguous statements unrelated to features of delirium (e.g., confusion), but nothing else--no description, no details about the confusion, and the next day no further comment.                                                                                                                  | Cases where healthcare providers wrote ambiguous statements unrelated to features of delirium (e.g., confusion), but nothing else--no description, no details about the confusion, and the next day no further comment.                                                                                                    | "drowsy, pain not controlled with movement, confused"<br>[EMR] |
| No evidence (<10%) | In general, the overarching principle is that the patient's behavior must be well outside the range of normal behavior. So, for instance, a report of transient episode of disorientation upon awakening from a nap would not be considered abnormal. Forgetfulness or sleepiness as isolated symptoms are not sufficient. | In general, the overarching principle is that the patient's behavior must be well outside the range of normal behavior. So, for instance, a report of transient episode of disorientation upon awakening from a nap would not be considered abnormal. Forgetfulness or sleepiness as isolated symptoms are not sufficient. |                                                                |

Abbreviations: EMR, electronic medical record; ICDSC, Intensive Care Delirium Screening Checklist; RASS, Richmond Agitation-Sedation Score.

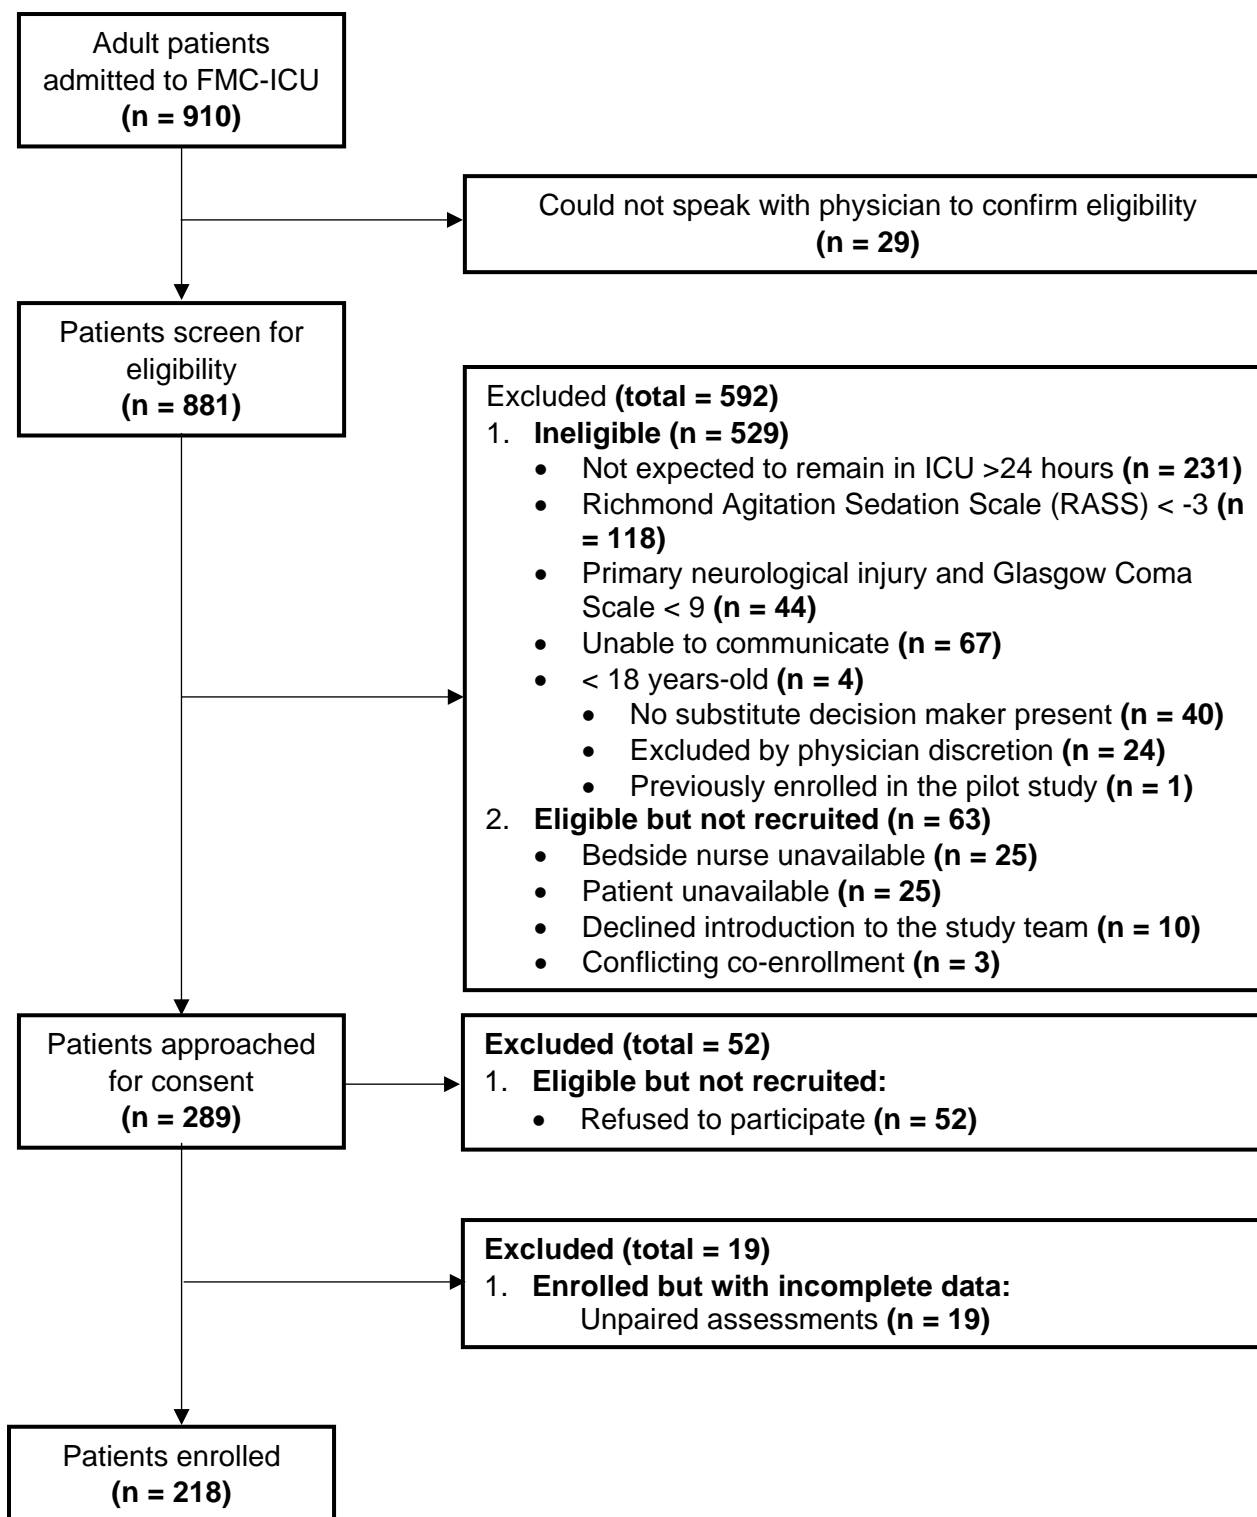

Supplementary Figure S1. Participant flow diagram.
